# Supplementary material
Source: HighWire-hosted journal article supplement (https://bmjpaedsopen.bmj.com/content/3/1/e000509)
Supplement: inline-supplementary-material-1 [file inline-supplementary-material-1.pdf]

**PROFORMA****Assessment of school readiness of children and factors associated with risk of inadequate school readiness: an observational study from Ujjain Madhya Pradesh**

Date: \_\_\_\_\_ Time: \_\_\_\_\_ Form Filled By: \_\_\_\_\_

**Socio-Demographic Profile**

1. Name : \_\_\_\_\_
2. Age (completed months) : \_\_\_\_\_ DOB(DD/MM/YY): \_\_\_\_\_
3. Gender : 1. Male  2. Female
4. Religion : 1. Hindu  2. Non Hindu
5. Mother's education : 1. Higher senior secondary / Higher   
2. No school / Middle school
6. Father's education : 1. Higher senior secondary / Higher   
2. No school / Middle school
7. Father's occupation : 1. Unskilled  2. Skilled  3. Professional
8. Monthly family income : 1. > 3000  2. < 3000
9. Socio-economic classification based (Modified Kuppaswamy scale)  
1. Upper  2. Upper middle  3. Lower middle   
4. Upper lower  5. Lower
10. Place of residence : 1. Rural  2. Urban
11. Type of family : 1. Joint  2. Nuclear
12. Number of members in the family: 1. >4 members  2. <4 members
13. Age of mother : .....
14. Age of father : .....
15. Birth weight of child .....
16. Type of delivery : 1. Normal  2. Cesarean
18. Handedness Right  Left

**19. Interaction**

A. How many hours on average do mother spend with child \_\_\_\_\_

B. Do you take your child to playground or garden? \_\_\_\_\_

C. Do you teach your child \_\_\_\_\_

**20. Illness in last 3 month**Loose motion Any reason for hospitalization 

outcome variable according to DAS II, school readiness scale score

| S. no | Indicators                  | Early number concept | Matching letter like form | Phonological Processing |
|-------|-----------------------------|----------------------|---------------------------|-------------------------|
| 1     | Raw score                   |                      |                           |                         |
| 2     | Item set                    |                      |                           |                         |
| 3     | Ability score               |                      |                           |                         |
| 4     | Percentile score            |                      |                           |                         |
| 5     | T score                     |                      |                           |                         |
| 6     | Total T score               |                      |                           |                         |
| 7     | School readiness            |                      |                           |                         |
| 8     | School readiness percentile |                      |                           |                         |
